# Supplementary material
Source: publisher figshare collection journal article supplement (https://acs.figshare.com/ndownloader/files/19354427)
Supplement: Supplementary file 1 [file 19354427]

## Supporting Information

### **Click-RNA for Rapid Capture and Identification of Intracellular MicroRNA Targets**

Pengjuan Zhang,<sup>†,‡,§</sup> Haohao Fu,<sup>†,§</sup> Shuangli Du,<sup>†</sup> Fengchao Wang,<sup>†</sup> Jie Yang,<sup>†</sup> Wensheng Cai,<sup>\*,†</sup> and Dingbin Liu<sup>\*,†</sup>

*<sup>†</sup> College of Chemistry, Research Center for Analytical Sciences, State Key Laboratory of Medicinal Chemical Biology, and Tianjin Key Laboratory of Molecular Recognition and Biosensing, Nankai University, Tianjin 300071 (China)*

*<sup>‡</sup> University of Environmental Engineering, Qinhuangdao, Hebei 066102 (China)*

**Molecular simulations.** The structures of PAZ and RNA were obtained from Protein Data Bank ([www.rcsb.org](http://www.rcsb.org), 4OLA, resid: 222-348) and generated by Avogadro (5'CUGAUGUUGA'3).<sup>2</sup> The initial structure of the protein-ligand hybrids in this study were prepared based on the binding site of PAZ identified in previous studies.<sup>3-4</sup> The protein-ligand complexes were then solvated in an equilibrated, cubic box of TIP3P water molecules.<sup>5</sup> The CHARMM 36m<sup>6</sup> and CHARMM general force field (CGenFF)<sup>7</sup> were utilized to describe biomolecules and DBCO, respectively.

All the atomistic MD simulations presented herein were performed using the parallel, scalable program NAMD 2.13.<sup>8</sup> Covalent bonds involving hydrogen atoms were constrained to their equilibrated lengths by means of the SHAKE/RATTLE<sup>9-10</sup> and SETTLE algorithms<sup>11</sup> for the organic and water molecules, respectively. Hydrogen-mass repartitioning<sup>12</sup> was used and a time step of 4 fs was applied to integrate the equation of motion. The particle mesh Ewald (PME) method<sup>13</sup> was employed to evaluate the long-range electrostatic forces. The temperature and the pressure were maintained at 300 K and 1 atm, respectively, using Langevin dynamics<sup>14</sup> and the Langevin piston method.<sup>15</sup> The short range van der Waals (VDW) and electrostatic interactions were calculated by the smoothed 12.0 Å spherical cutoff. Periodic boundary conditions (PBCs) were applied in the three directions of Cartesian space. Visualizations and analyses of the MD trajectories were performed with the VMD program.<sup>16</sup>

The MM-PBSA method<sup>1</sup> was employed to calculate the binding free energy of the PAZ:ligand complexes. The dielectric constants of the protein and the solvent were set to 2.0 and 78.54, respectively. The solvent radius was set to 1.4 Å and the grid spacing was 0.5 Å in each dimension. iAPBS,<sup>17</sup> the interface calling APBS<sup>18</sup> in NAMD, was used to calculate the Poisson–Boltzmann contribution to the binding free energy. Three 400 ns simulations characterizing PAZ, RNA and DBCO-tagged RNA in bulk water were performed to provide the trajectories needed in the free-energy calculations. The last 200-ns trajectories for protein-ligand complexes and the last 100-ns one were used for MM-PBSA calculation.

## Supplementary Figures and Tables

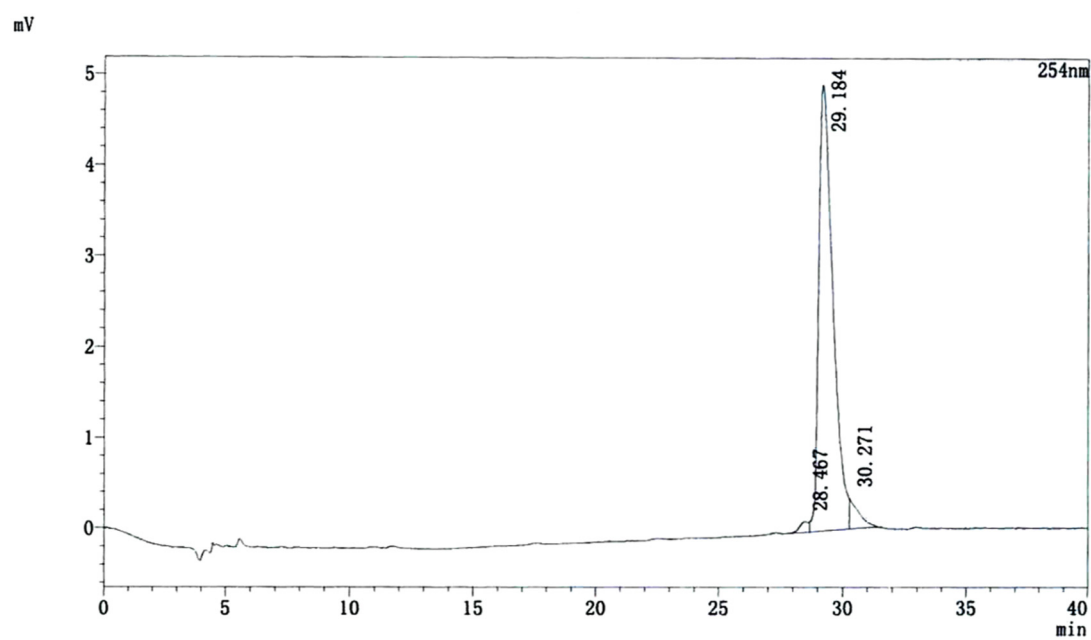

**Figure S1.** HPLC analysis of single-stranded 3'-NH<sub>2</sub>-miR-21.

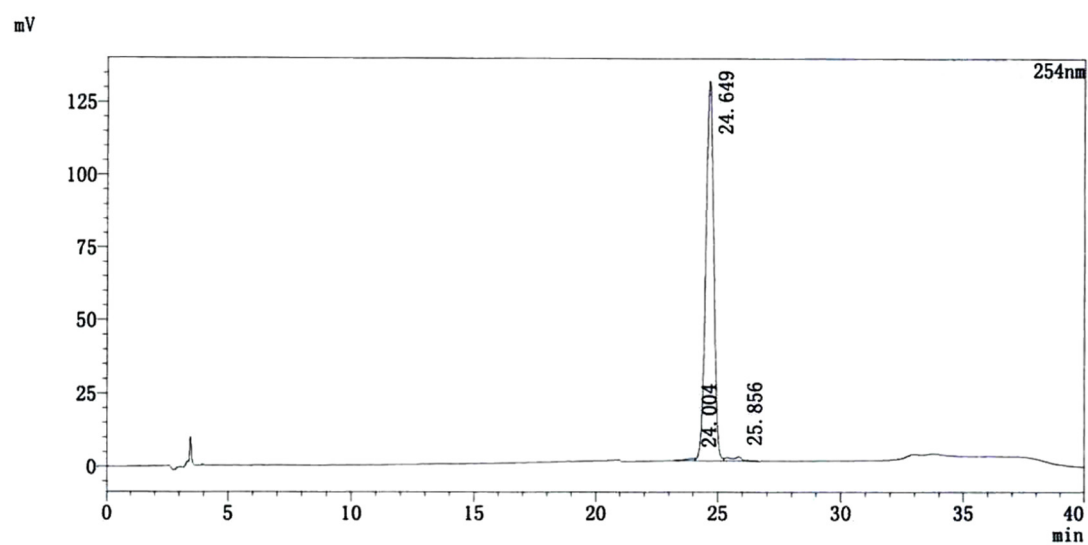

**Figure S2.** HPLC analysis of single-stranded 3'-DBCO-miR-21.

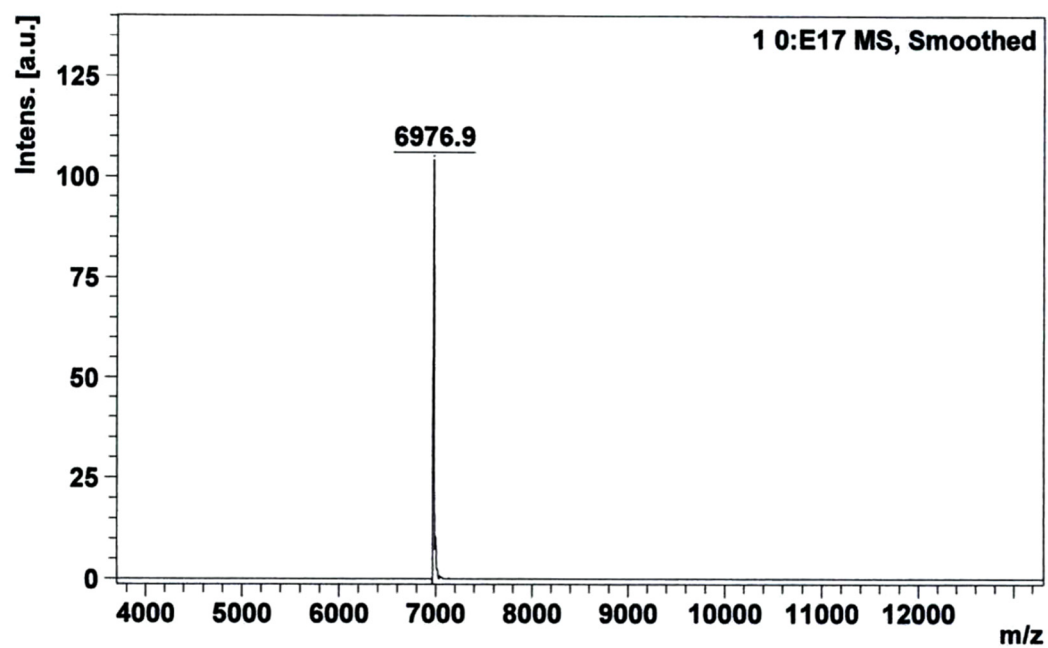

**Figure S3.** TOF-MS analysis of single-stranded 3'-NH<sub>2</sub>-miR-21.

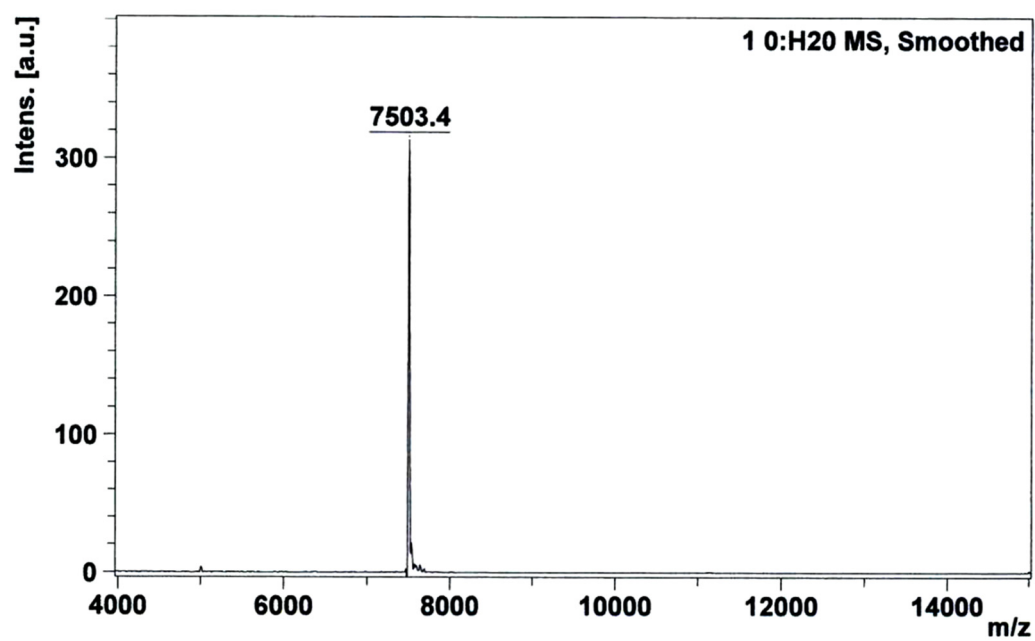

**Figure S4.** TOF-MS analysis of single-stranded 3'-DBCO-miR-21.

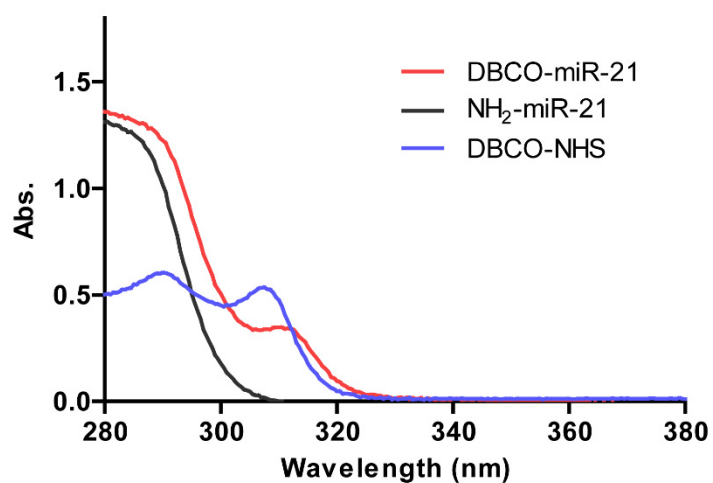

**Figure S5.** UV-spectrum characterization of double-stranded DBCO-miR-21. Compared with double-stranded NH<sub>2</sub>-miR-21 (black), the specific peak of DBCO (blue) at around 310 nm could be observed for the DBCO-miR-21 (red).

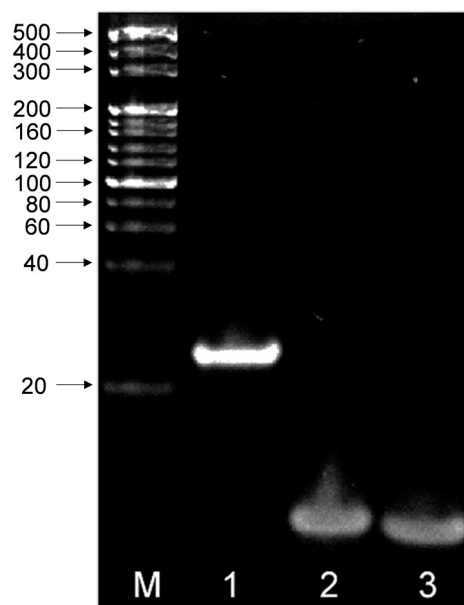

**Figure S6.** PAGE analysis of double-stranded DBCO-miR-21. M: 20bp Ladder marker; 1: the duplex of DBCO-miR-21 hybridized with its antisense strand; 2: single-stranded 3'-DBCO-miR-21; 3: the antisense strand of 3'-DBCO-miR-21.



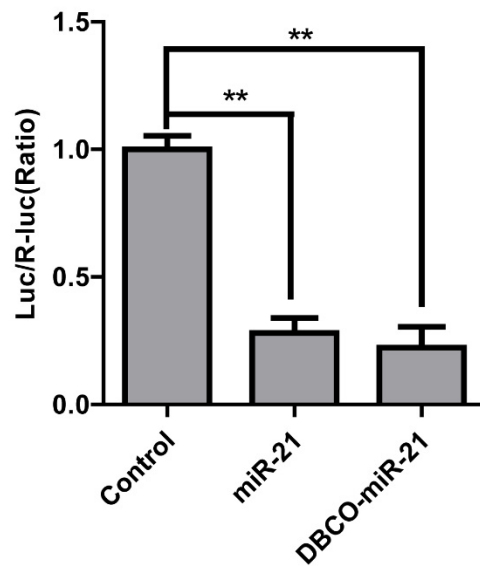

**Figure S7.** Function confirmation of DBCO-miR-21. HEK 293T cells were co-transfected pmiRGLO-PDCD4 with NC, miR-21 mimics, and DBCO-miR-21 respectively with the same concentration (30 nM). The luciferase activity was normalized to that of Renilla luciferase activity. Data are shown as mean  $\pm$  SD (n = 6). \*\*,  $P < 0.01$ .

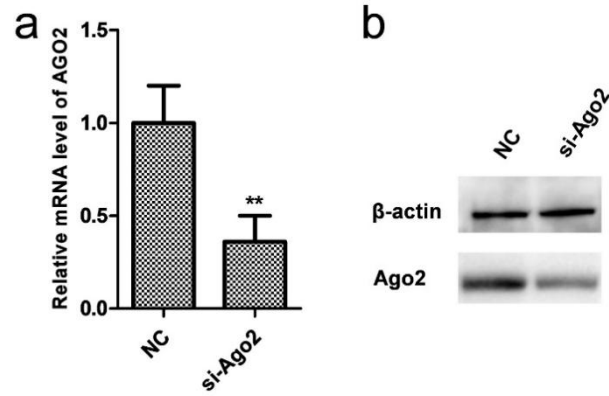

**Figure S8.** Relative mRNA expression levels and Ago2 protein abundance in HEK 293T cells after knockdown of Ago2. (a) qRT-PCR analysis of the mRNA expression levels of Ago2 in HEK 293T cells transfected with 30 nM of NC and si-Ago2, respectively. Data are shown as mean  $\pm$  SD (n = 3). \*\*, P < 0.01. (b) western blot analysis of Ago2 protein abundance in HEK 293T cells transfected with 30 nM of NC and si-Ago2, respectively.

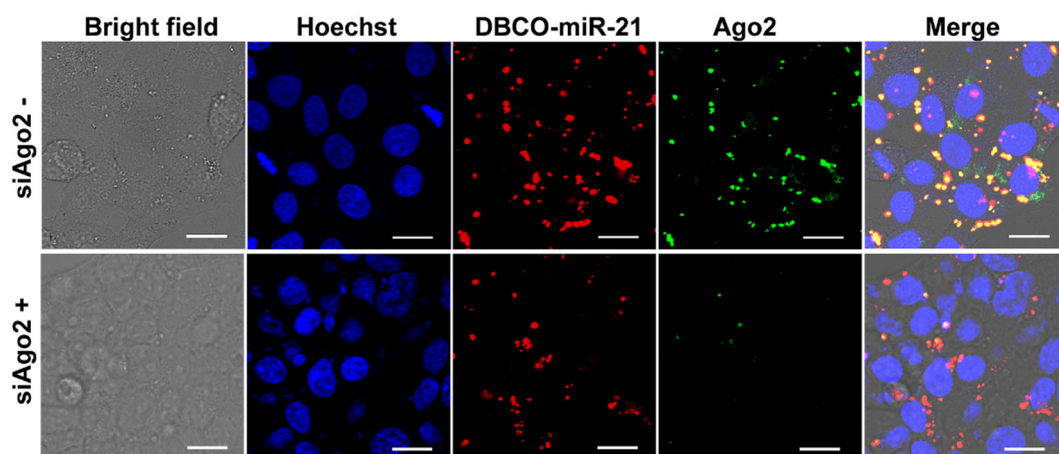

**Figure S9.** Co-localization of Ago2 and DBCO-miR-21 before and after knockdown of Ago2. HEK 293T cells were transfected with or without si-Ago2, and the cells were transfected with DBCO-miR-21 at 24 h post-transfection. The cells were then fixed, stained with azide-Cy5 (red) by click chemistry, immunofluorescence-stained with anti-Ago2 (green), counterstained with Hoechst (blue), and imaged with a Nikon A1+ Confocal Microscope. Scale bar: 20  $\mu$ m.

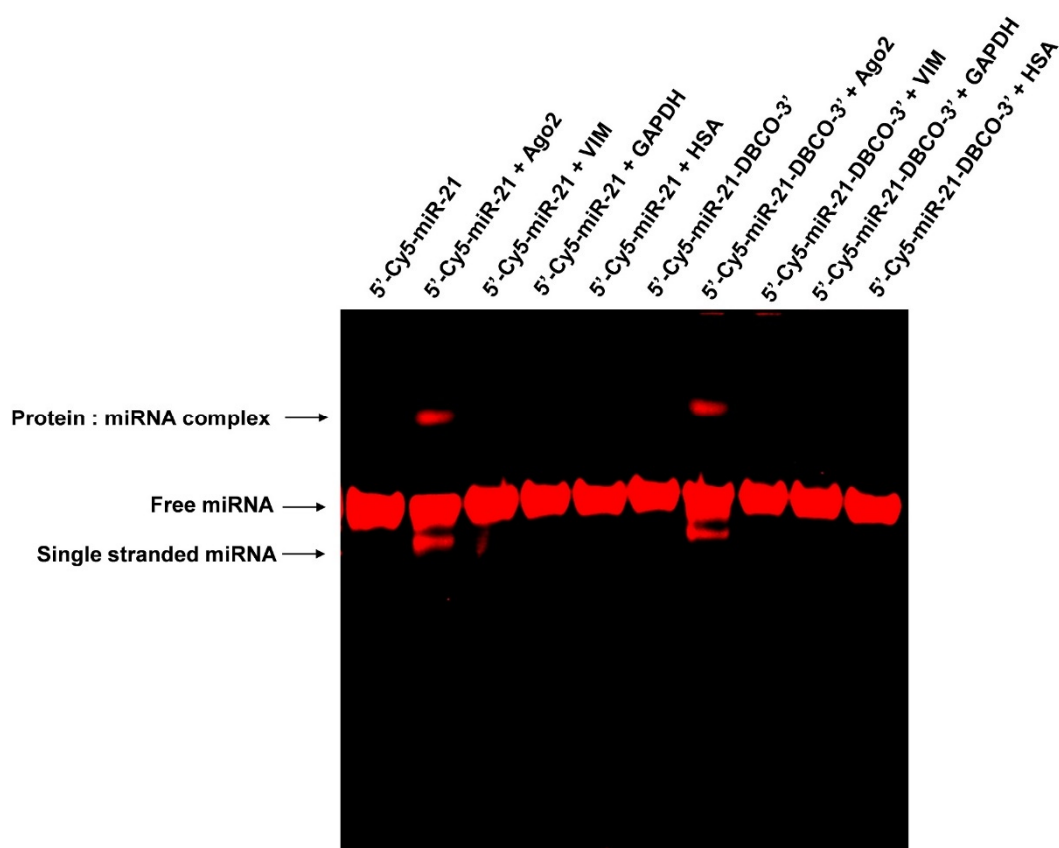

**Figure S10.** Binding specificity between DBCO-miR-21 and Ago2. Recombinant Ago2, VIM, GAPDH, and HSA (1  $\mu$ g for each kind of proteins) were reacted with 10 nM of 5'-Cy5-miR-21-3'-DBCO mimics or 5'-Cy5-miR-21 mimics in the binding buffer (10  $\mu$ L), respectively. Complexes were resolved by 5% native PAGE at 4 °C and imaged with Azure c600 (Azure Biosystems, USA).

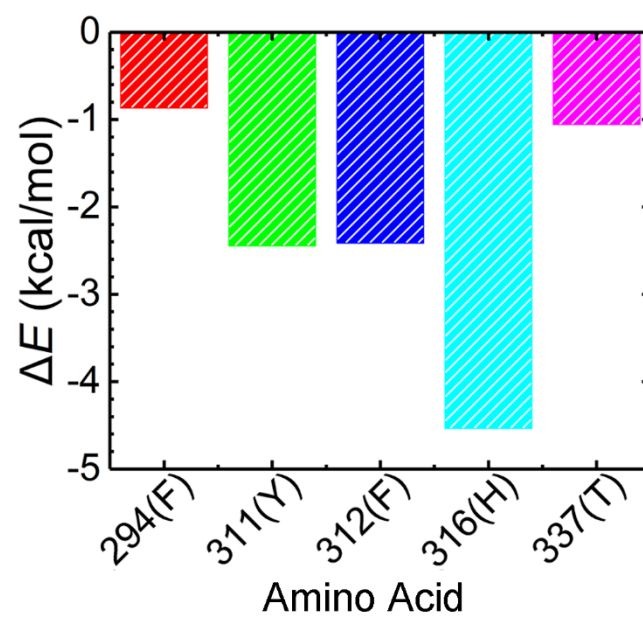

**Figure S11.** Interaction energy between DBCO and its adjacent amino acids.

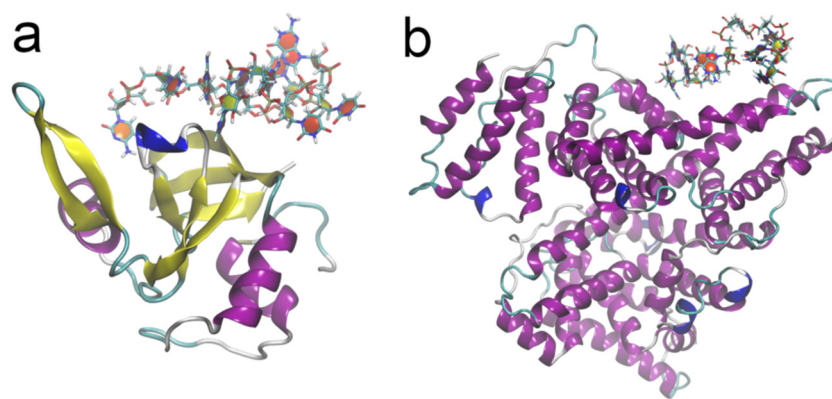

**Figure S12.** Three-dimensional arrangements of the (a) PAZ:DBCO-tagged miRNA (Adsorption motif) and (b) HSA:miRNA complex. The surface of HSA seems very hydrophilic such that the HSA:DBCO-tagged RNA hybrid is not energetically stable.

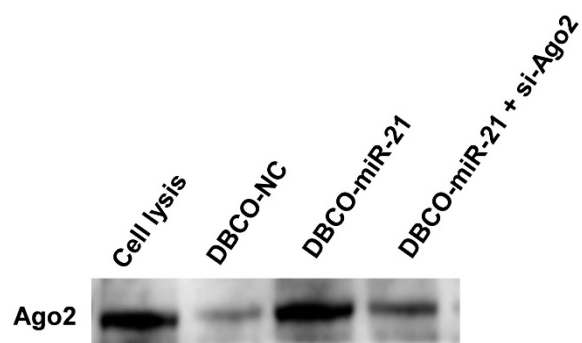

**Figure S13.** Western blotting analysis of Ago2 protein in the pulled-down lysate samples from the cells transfected with DBCO-miR-21 (100 nM).

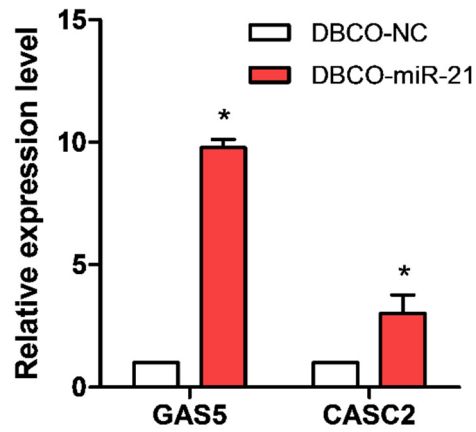

**Figure S14.** Application of DBCO-miR-21 as “bait” to pull down long non-coding RNA target genes inside cells. The target genes were identified with qRT-PCR analysis. Data are shown as mean  $\pm$  SD ( $n = 3$ ). \*,  $P < 0.05$ .



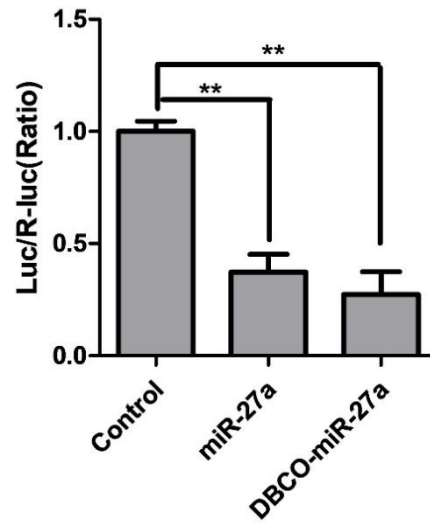

**Figure S15.** Function confirmation of DBCO-miR-27a. HEK 293T cells were co-transfected pmiRGLO-TGF- $\beta$ RI with NC, miR-27a mimics, and DBCO-miR-27a respectively with the same concentration (30 nM). The luciferase activity was normalized to that of Renilla luciferase activity. Data are shown as mean  $\pm$  SD (n = 6). \*\*,  $P < 0.01$ .

**Table S1.** Absolute binding affinity (in kcal/mol) of DBCO-tagged miRNA towards Ago2 with respect to HSA.

| Molecular assembly                  | Binding affinity |
|-------------------------------------|------------------|
| PAZ: DBCO-tagged miRNA (Insertion)  | -539.0           |
| PAZ: DBCO-tagged miRNA (Adsorption) | -439.3           |
| HSA: DBCO-tagged miRNA              | 38.1             |

**Table S2.** Sequences of miR-21 and negative control (NC), and the 3'UTR sequences of PFKM, SKI, and TNKS.

|            |                                                   |
|------------|---------------------------------------------------|
| miR-21     | 3'-AGUUGUAGUCAGACU <b>AUUCGAU</b> -5'             |
| NC         | 3'-GAUGAGAAAGAUC <b>CCCAACACU</b> -5'             |
| PFKM 3'UTR | 274-5'...GAAUUUUCUAA <b>AAAUAAAGCUU</b> ...3'-296 |
| SKI 3'UTR  | 278-5'...UUUACACUUUUGUU <b>AUAAGCUA</b> ...3'-300 |
| TNKS 3'UTR | 538-5'...CUGACAGCCUAGAA <b>AUAAGCUG</b> ...3'-560 |

The bold font indicates the “seed” regions responsible for the recognition and binding between miR-21 and the target sequences. The asterisk represents the mismatches between NC and the miR-21 sequences in the “seed” region.

**Table S3.** Primers used for UTR clone, plasmid construction, and qRT-PCR.

| Primers | Forward (5'-3')              | Reverse (5'-3')               | Application |
|---------|------------------------------|-------------------------------|-------------|
| BCL2    | ATCGCCCTGTGGATGACTG<br>AGT   | GCCAGGAGAAATCAAACAGA<br>GGC   | qRT-PCR     |
| c-Myc   | CCTGGTGCTCCATGAGGAG<br>AC    | CAGACTCTGACCTTTTGCCA<br>GG    | qRT-PCR     |
| WNT1    | CTCTTCGGCAAGATCGTCAA<br>CC   | CGATGGAACCTTCTGAGCAG<br>GA    | qRT-PCR     |
| BTG2    | GCAGAGGCTTAAGGTCTTC<br>AGC   | TGGTTGATGCGAATGCAGCG<br>GT    | qRT-PCR     |
| TIMP3   | TACCGAGGCTTCACCAAGAT<br>GC   | CATCTTGCCATCATAGACGCG<br>AC   | qRT-PCR     |
| NFIB    | GGAACCAAGTCCTACAGGA<br>GAC   | GAATCCTGTGGAGATGCAGA<br>GC    | qRT-PCR     |
| STAT3   | CTTTGAGACCGAGGTGTATC<br>ACC  | GGTCAGCATGTTGTACCACA<br>GG    | qRT-PCR     |
| RECK    | AATCCTTGCCCTGCCAATGA<br>GC   | GCACCTGGATTAGTGTCCCT<br>TG    | qRT-PCR     |
| BMPR2   | AGAGACCCAAGTTCCCAGA<br>AGC   | CCTTTCCTCAGCACACTGTG<br>CA    | qRT-PCR     |
| PDCD4   | ACTCCTAGAGCACCACAGTT<br>GGT  | CTCAGAAGCACGGTAGCCTT<br>ATC   | qRT-PCR     |
| PTEN    | GAAGACCATAACCCACCACA<br>GCT  | ACACCAGTTCGTCCCTTTCC<br>AG    | qRT-PCR     |
| TPM1    | GAAGAGATCAAGGTCTTTTC<br>CGAC | GGCTTTGTACTTCAGTTTCTG<br>AGCG | qRT-PCR     |
| TNKS    | AGAGTACCTGCTACACCAC<br>GGT   | AGTCCGCCACATTGACAGAA<br>GC    | qRT-PCR     |
| SKI     | CCTTCCGAAAAGGACAAGC<br>CGT   | GCTCTTTCTCACTCGCTGAC<br>AC    | qRT-PCR     |
| RBAK    | AGCCGTGGATAATGGGAGG<br>TGA   | CTTCTCTTCAGTCAGGGTTT<br>TGC   | qRT-PCR     |
| PFKM    | GCTTCTAGCTCATGTCAGAC<br>CC   | CCAATCCTCACAGTGGAGCG<br>AA    | qRT-PCR     |
| MCAM    | ATCGCTGCTGAGTGAACCA<br>CAG   | CTACTCTCTGCCTCACAGGT<br>CA    | qRT-PCR     |
| ING3    | AAGGCAACACGGTTCGCAG<br>CTT   | GCCATTTGCTCTTCCCTCCA<br>CT    | qRT-PCR     |
| BMP3    | AAGGCAACACGGTTCGCAG<br>CTT   | GACTTGTTAGCGATGTCAG<br>ATTG   | qRT-PCR     |

|                   |                                          |                                           |                         |
|-------------------|------------------------------------------|-------------------------------------------|-------------------------|
| ARMCX1            | AGGAGTCTACGGACACCTC<br>AGA               | GTCCCAAACCTCACCTCAGGC<br>TT               | qRT-PCR                 |
| DKK2              | GGATGGCAGAATCTAGGAA<br>GACC              | CTGATGGAGCACTGGTTTGC<br>AG                | qRT-PCR                 |
| PDZD2             | AGTGACTGTCGCTGGCTTT<br>CAG               | GACAGAGCACTGGCTAGTTC<br>AC                | qRT-PCR                 |
| GAPDH             | CGAGCCACATCGCTCAGAC<br>A                 | GTGGTGAAGACGCCAGTGG<br>A                  | qRT-PCR                 |
| GAS5              | CTTCTGGGCTCAAGTGATC<br>CT                | TTGTGCCATGAGACTCCATC<br>AG                | qRT-PCR                 |
| CASC2             | TACAGGACAGTCAGTGGTG<br>GTA               | ACATCTAGCTTAGGAATGTGG<br>C                | qRT-PCR                 |
| PDCD4             | <u>CGAGCTCGGACATTTTATAA</u><br>ACCTACAT  | <u>CCTGCAGGAATCAATACTGC</u><br>TTCACATG   | Plasmid<br>construction |
| PFKM              | <u>CGAGCTCGCATGACTTCTG</u><br>CCCCAGCTT  | <u>CCTGCAGGAAGCACAGTGAC</u><br>CAGTTGGC   | Plasmid<br>construction |
| SKI               | <u>CGAGCTCGCAACTACAGCT</u><br>GGAGACGGG  | <u>CCTGCAGGCAGATGGCGTCA</u><br>TGTGTTGG   | Plasmid<br>construction |
| TNKS              | <u>CGAGCTCGACAGCCGCAGA</u><br>GCAGAAG    | <u>CCTGCAGGAAGGGAACAGTA</u><br>GCAGTTGAGT | Plasmid<br>construction |
| FOXO1             | CTACGAGTGGATGGTCAAG<br>AGC               | CCAGTTCCTTCATTCTGCACA<br>CG               | qRT-PCR                 |
| SFRP1             | CAATGCCACCGAAGCCTCC<br>AAG               | CAAACCTCGCTGGCACAGAGA<br>TG               | qRT-PCR                 |
| PINK1             | GTGGACCATCTGGTTCAAC<br>AGG               | GCAGCCAAAATCTGCGATCA<br>CC                | qRT-PCR                 |
| SMAD5             | CAGGAGTTTGCTCAGCTTCT<br>GG               | GGTGCTGGTTACATCCTGCC<br>G                 | qRT-PCR                 |
| PPAR $\gamma$     | AGCCTGCGAAAGCCTTTTG<br>GTG               | GGCTTCACATTGAGCAAACC<br>TGG               | qRT-PCR                 |
| TGFBRI            | GACAACGTCAGGTTCTGGC<br>TCA               | CCGCCACTTTCCTCTCCAAA<br>CT                | qRT-PCR                 |
| PLK2              | CAACAATGGTGCTCACATGA<br>GCC              | GGAGCATCTGTTGCTGGGAA<br>AAC               | qRT-PCR                 |
| CYP3A4            | CCGAGTGGATTTCCTTCAG<br>CTG               | TGCTCGTGGTTTCATAGCCA<br>GC                | qRT-PCR                 |
| TGFBRI            | <u>CGAGCTCGGAGGTGGTAG</u><br>CTA AAGAACA | <u>CCTGCAGGTAATGACTGAAG</u><br>GAAATGGA   | Plasmid<br>construction |
| miR-21<br>mimics  | UAGCUUAUCAGACUGAUGU<br>UGA               | UCAACAUAGUCUGAUAAAGC<br>UA                | Probe                   |
| miR-27a<br>mimics | UUCACAGUGGCUAAGUUCC<br>GC                | GCGGAACUUAGCCACUGUG<br>AA                 | Probe                   |

|                  |                                         |                             |       |
|------------------|-----------------------------------------|-----------------------------|-------|
| Negative control | UCACAACCCCUAGAAAGAG<br>UAG              | CUACUCUUUCUAGGAGGUU<br>GUGA | Probe |
| DBCO-miR-21      | UAGCUUAUCAGACUGAUGU<br>UGA-DBCO         | UCAACAUCAGUCUGAUAAGC<br>UA  | Probe |
| DBCO-miR-27a     | UUCACAGUGGCUAAGUUC<br>GC-DBCO           | GCGGAACUUAGCCACUGUG<br>AA   | Probe |
| DBCO-NC          | UCACAACCCCUAGAAAGAG<br>UAG-DBCO         | CUACUCUUUCUAGGAGGUU<br>GUGA | Probe |
| Cy5-miR-21       | Cy5-<br>UAGCUUAUCAGACUGAUGU<br>UGA      | UCAACAUCAGUCUGAUAAGC<br>UA  | Probe |
| Cy5-miR-21-DBCO  | Cy5-<br>UAGCUUAUCAGACUGAUGU<br>UGA-DBCO | UCAACAUCAGUCUGAUAAGC<br>UA  | Probe |

## References

- (1) Srinivasan, J.; Cheatham, T. E.; Cieplak, P.; Kollman, P. A.; Case, D. A. Continuum solvent studies of the stability of DNA, RNA, and phosphoramidate-DNA helices. *J. Am. Chem. Soc.* **1998**, *120* (37), 9401-9409.
- (2) Hanwell, M. D.; Curtis, D. E.; Lonie, D. C.; Vandermeersch, T.; Zurek, E.; Hutchison, G. R. Avogadro: an advanced semantic chemical editor, visualization, and analysis platform. *J. Cheminformatics* **2012**, *4* (1), 17.
- (3) Ma, J.-B.; Ye, K.; Patel, D. J. Structural basis for overhang-specific small interfering RNA recognition by the PAZ domain. *Nature* **2004**, *429*, 318.
- (4) Song, J.-J.; Liu, J.; Tolia, N. H.; Schneiderman, J.; Smith, S. K.; Martienssen, R. A.; Hannon, G. J.; Joshua-Tor, L. The crystal structure of the Argonaute2 PAZ domain reveals an RNA binding motif in RNAi effector complexes. *Nat. Struct. Biol.* **2003**, *10*, 1026.
- (5) Jorgensen, W. L.; Chandrasekhar, J.; Madura, J. D.; Impey, R. W.; Klein, M. L. Comparison of simple potential functions for simulating liquid water. *J. Chem. Phys.* **1983**, *79* (2), 926-935.
- (6) Huang, J.; Rauscher, S.; Nawrocki, G.; Ran, T.; Feig, M.; de Groot, B. L.;

Grubmüller, H.; MacKerell, A. D., Jr. CHARMM36m: an improved force field for folded and intrinsically disordered proteins. *Nat. Methods* **2017**, *14* (1), 71.

(7) Vanommeslaeghe, K.; Hatcher, E.; Acharya, C.; Kundu, S.; Zhong, S.; Shim, J.; Darian, E.; Guvench, O.; Lopes, P.; Vorobyov, I.; MacKerell, A. D., Jr. CHARMM general force field: A force field for drug-like molecules compatible with the CHARMM all-atom additive biological force fields. *J. Comput. Chem.* **2010**, *31* (4), 671-690.

(8) Phillips, J. C.; Braun, R.; Wang, W.; Gumbart, J.; Tajkhorshid, E.; Villa, E.; Chipot, C.; Skeel, R. D.; Kale, L.; Schulten, K. Scalable molecular dynamics with NAMD. *J. Comput. Chem.* **2005**, *26* (16), 1781-1802.

(9) Andersen, H. C. Rattle: A “velocity” version of the shake algorithm for molecular dynamics calculations. *J. Comput. Phys.* **1983**, *52* (1), 24-34.

(10) Ryckaert, J.-P.; Ciccotti, G.; Berendsen, H. J., Numerical integration of the cartesian equations of motion of a system with constraints: molecular dynamics of n-alkanes. *J. Comput. Phys.* **1977**, *23* (3), 327-341.

(11) Miyamoto, S.; Kollman, P. A. Settle: An analytical version of the SHAKE and RATTLE algorithm for rigid water models. *J. Comput. Chem.* **1992**, *13* (8), 952-962.

(12) Hopkins, C. W.; Le Grand, S.; Walker, R. C.; Roitberg, A. E. Long-time-step molecular dynamics through hydrogen mass repartitioning. *J. Chem. Theory Comput.* **2015**, *11* (4), 1864-1874.

(13) Darden, T.; York, D.; Pedersen, L. Particle mesh Ewald: An  $N \cdot \log(N)$  method for Ewald sums in large systems. *J. Chem. Phys.* **1993**, *98* (12), 10089-10092.

(14) Uhlenbeck, G. E.; Ornstein, L. S. On the theory of the Brownian motion. *Phys. Rev.* **1930**, *36* (5), 823.

(15) Feller, S. E.; Zhang, Y.; Pastor, R. W.; Brooks, B. R. Constant pressure molecular dynamics simulation: the Langevin piston method. *J. Chem. Phys.* **1995**, *103* (11), 4613-4621.

(16) Humphrey, W.; Dalke, A.; Schulten, K. VMD: visual molecular dynamics. *J. Mol. Graph.* **1996**, *14* (1), 33-38.

- (17)Konecny, R.; Baker, N. A.; McCammon, J. A. iAPBS: a programming interface to the adaptive Poisson–Boltzmann solver. *Comput. Sci. Discov.* **2012**, 5 (1), 015005.
- (18)Baker, N. A.; Sept, D.; Joseph, S.; Holst, M. J.; McCammon, J. A. Electrostatics of nanosystems: application to microtubules and the ribosome. *Proc. Natl. Acad. Sci. U.S.A.* **2001**, 98 (18), 10037-10041.
